# Supplementary material for: Median fin function during the escape response of bluegill sunfish (Lepomis macrochirus). II: Fin-ray curvature
Source: Oxford University Press journal article supplement (doi:10.1242/jeb.068593), 2012-07-25
Supplement: jeb068593tabless1-s2.pdf [file jeb068593tabless1-s2.pdf]

Table S1. Soft dorsal fin-ray curvature parameters by fish

| Parameter           | Fin ray | $\Delta\text{Time}$ (ms from $\theta'_{\text{event}}$ ) |          |          | Mean $\kappa$ ( $\text{mm}^{-1}$ ) |            |            | Max $\kappa$ ( $\text{mm}^{-1}$ ) |        |        |
|---------------------|---------|---------------------------------------------------------|----------|----------|------------------------------------|------------|------------|-----------------------------------|--------|--------|
|                     |         | Fish A                                                  | Fish B   | Fish C   | Fish A                             | Fish B     | Fish C     | Fish A                            | Fish B | Fish C |
| Spanwise curvature  |         |                                                         |          |          |                                    |            |            |                                   |        |        |
| span0               | DSp10   | -1.5±8.4                                                | 0.5±2.8  | -1.1±4.5 | 0.04±0.03                          | 0.03±0.01  | 0.06±0.02  | 0.07                              | 0.04   | 0.07   |
|                     | DRy2    | -0.7±6.8                                                | -3.1±1.0 | -3.8±1.1 | 0.08±0.02                          | 0.06±0.07  | 0.04±0.02  | 0.10                              | 0.14   | 0.06   |
|                     | DRy5    | 0.9±1.4                                                 | 0.8±0.8  | -0.9±1.1 | 0.11±0.03                          | 0.12±0.02  | 0.11±0.02  | 0.14                              | 0.14   | 0.12   |
|                     | DRy8    | 1.2±1.1                                                 | 0.9±1.1  | 0.9±0.5  | 0.35±0.13                          | 0.31±0.05  | 0.14±0.04  | 0.49                              | 0.37   | 0.18   |
|                     | DRy12   | -4.9±0.8                                                | 2.3±3.8  | -2.1±0.9 | 0.17±0.07                          | 0.17±0.13  | 0.25±0.15  | 0.24                              | 0.32   | 0.39   |
| span1               | DSp10   | -1.5±8.5                                                | 1.8±4.9  | 7.1±10.0 | -0.03±0.02                         | -0.04±0.02 | -0.04±0.03 | -0.05                             | -0.05  | -0.06  |
|                     | DRy2    | 4.3±1.4                                                 | 3.9±3.4  | 5.1±0.3  | -0.08±0.04                         | -0.22±0.05 | -0.15±0.03 | -0.12                             | -0.28  | -0.18  |
|                     | DRy5    | 9.9±1.1                                                 | 9.7±0.2  | 9.9±0.7  | -0.28±0.16                         | -0.26±0.05 | -0.26±0.05 | -0.46                             | -0.31  | -0.32  |
|                     | DRy8    | 10.5±1.0                                                | 10.1±1.3 | 10.0±1.4 | -0.23±0.11                         | -0.37±0.23 | -0.22±0.05 | -0.35                             | -0.59  | -0.27  |
|                     | DRy12   | 1.8±0.5                                                 | 4.1±5.3  | 4.0±4.9  | -0.23±0.03                         | -0.36±0.15 | -0.27±0.07 | -0.27                             | -0.53  | -0.32  |
| span2               | DSp10   | -8.0±2.6                                                | -6.4±2.7 | 0.9±12.4 | 0.03±0.01                          | 0.07±0.03  | 0.04±0.02  | 0.04                              | 0.09   | 0.07   |
|                     | DRy2    | -6.5±1.8                                                | -3.8±1.8 | 6.8±0.2  | 0.06±0.02                          | 0.13±0.04  | 0.14±0.01  | 0.07                              | 0.16   | 0.15   |
|                     | DRy5    | -4.8±0.6                                                | -2.6±2.9 | -1.7±3.7 | 0.08±0.03                          | 0.13±0.04  | 0.15±0.02  | 0.11                              | 0.18   | 0.17   |
|                     | DRy8    | -5.9±1.0                                                | -1.2±2.5 | -1.4±4.2 | 0.09±0.03                          | 0.14±0.02  | 0.20±0.06  | 0.12                              | 0.16   | 0.26   |
|                     | DRy12   | -4.6±0.9                                                | 3.0±1.2  | 3.2±4.9  | 0.12±0.03                          | 0.16±0.07  | 0.15±0.02  | 0.14                              | 0.24   | 0.17   |
| Chordwise curvature |         |                                                         |          |          |                                    |            |            |                                   |        |        |
| chord1              | DSp10   | 1.0±11.2                                                | -4.5±1.3 | -5.7±0.5 | -0.05±0.00                         | -0.09±0.02 | -0.08±0.01 | -0.05                             | -0.10  | -0.09  |
|                     | DRy2    | 0.1±0.7                                                 | 0.2±0.7  | -0.5±0.5 | -0.07±0.01                         | -0.16±0.03 | -0.13±0.01 | -0.08                             | -0.20  | -0.15  |
|                     | DRy5    | 4.5±2.5                                                 | 4.6±0.5  | 3.5±2.0  | -0.04±0.01                         | -0.11±0.03 | -0.11±0.02 | -0.06                             | -0.14  | -0.13  |
|                     | DRy8    | 1.0±2.7                                                 | 2.7±3.1  | 1.9±1.9  | -0.05±0.00                         | -0.08±0.06 | -0.06±0.01 | -0.05                             | -0.14  | -0.08  |
| chord2              | DSp10   | 16.3±5.7                                                | 10.5±3.9 | 10.6±8.6 | 0.05±0.01                          | 0.11±0.02  | 0.08±0.02  | 0.07                              | 0.13   | 0.10   |
|                     | DRy2    | 12.8±6.9                                                | 2.9±10.3 | 6.4±1.8  | 0.08±0.02                          | 0.09±0.03  | 0.07±0.02  | 0.09                              | 0.13   | 0.09   |
|                     | DRy5    | 14.7±4.0                                                | 13.6±5.0 | 5.6±9.3  | 0.03±0.01                          | 0.04±0.01  | 0.05±0.01  | 0.04                              | 0.06   | 0.06   |
|                     | DRy8    | -6.3±0.8                                                | 6.1±12.3 | 2.2±1.0  | 0.07±0.00                          | 0.10±0.01  | 0.12±0.02  | 0.07                              | 0.10   | 0.13   |

$\Delta\text{Time}$  is the difference in time of a given parameter (individual rows) from the corresponding kinematic event of the Mid-trunk ( $\theta'_{\text{event}}$ ). Mean  $\kappa$  is the average curvature for all sequences for each fish. Max  $\kappa$  is the maximal curvature that was achieved by the fish; observed in any sequence. For  $\Delta\text{Time}$  and Mean  $\kappa$ , values are means  $\pm 1$  s.d. See text for details.  $N=3$  sequences for each fish.

Table S2. Anal fin-ray curvature parameters by fish

| Parameter           | Fin ray | $\Delta\text{Time}$ (ms from $\theta'_{\text{event}}$ ) |          |           | Mean $\kappa$ ( $\text{mm}^{-1}$ ) |            |            | Max $\kappa$ ( $\text{mm}^{-1}$ ) |        |        |
|---------------------|---------|---------------------------------------------------------|----------|-----------|------------------------------------|------------|------------|-----------------------------------|--------|--------|
|                     |         | Fish A                                                  | Fish B   | Fish C    | Fish A                             | Fish B     | Fish C     | Fish A                            | Fish B | Fish C |
| Spanwise curvature  |         |                                                         |          |           |                                    |            |            |                                   |        |        |
| span0               | ASp3    | -7.0±1.6                                                | 2.2±9.7  | -2.2±3.9  | 0.01±0.01                          | 0.02±0.00  | 0.01±0.01  | 0.02                              | 0.02   | 0.02   |
|                     | ARy2    | -4.2±1.1                                                | -2.7±2.5 | -1.3±1.3  | 0.05±0.03                          | 0.06±0.03  | 0.05±0.02  | 0.08                              | 0.08   | 0.07   |
|                     | ARy5    | 0.1±1.0                                                 | -0.1±1.3 | 0.7±0.6   | 0.09±0.04                          | 0.15±0.07  | 0.13±0.05  | 0.12                              | 0.22   | 0.18   |
|                     | ARy8    | -0.6±0.6                                                | 0.7±1.1  | 0.9±0.8   | 0.29±0.13                          | 0.37±0.19  | 0.17±0.10  | 0.43                              | 0.58   | 0.26   |
|                     | ARy12   | -3.5±3.9                                                | -2.1±1.9 | -2.7±1.6  | 0.09±0.03                          | 0.09±0.03  | 0.10±0.06  | 0.12                              | 0.11   | 0.14   |
| span1               | ASp3    | -5.1±4.8                                                | 8.4±7.2  | 5.9±5.7   | -0.01±0.00                         | -0.03±0.00 | -0.02±0.01 | -0.01                             | -0.03  | -0.02  |
|                     | ARy2    | 5.7±2.3                                                 | 3.6±1.8  | 4.1±1.1   | -0.08±0.02                         | -0.10±0.02 | -0.08±0.01 | -0.10                             | -0.12  | -0.08  |
|                     | ARy5    | 11.0±1.3                                                | 8.1±1.7  | 7.8±0.4   | -0.14±0.01                         | -0.21±0.07 | -0.21±0.10 | -0.15                             | -0.29  | -0.27  |
|                     | ARy8    | 12.3±1.2                                                | 7.9±0.6  | 10.2±1.1  | -0.20±0.10                         | -0.22±0.03 | -0.20±0.05 | -0.27                             | -0.23  | -0.24  |
|                     | ARy12   | 7.4±4.4                                                 | 6.4±1.6  | 2.3±2.7   | -0.23±0.08                         | -0.37±0.08 | -0.16±0.03 | -0.32                             | -0.46  | -0.18  |
| span2               | ASp3    | -9.0±3.2                                                | 1.8±7.5  | -0.1±6.5  | 0.03±0.02                          | 0.02±0.01  | 0.03±0.00  | 0.04                              | 0.03   | 0.03   |
|                     | ARy2    | -0.1±1.3                                                | -2.4±5.4 | -5.1±6.9  | 0.05±0.01                          | 0.10±0.04  | 0.09±0.02  | 0.06                              | 0.15   | 0.12   |
|                     | ARy5    | -3.2±3.4                                                | -6.2±1.4 | -5.2±2.9  | 0.07±0.01                          | 0.08±0.02  | 0.09±0.03  | 0.08                              | 0.10   | 0.12   |
|                     | ARy8    | -2.8±1.2                                                | -2.4±4.3 | -3.4±2.8  | 0.08±0.01                          | 0.10±0.04  | 0.15±0.04  | 0.09                              | 0.14   | 0.18   |
|                     | ARy12   | -6.5±1.4                                                | -4.6±1.3 | -2.3±2.8  | 0.10±0.04                          | 0.14±0.09  | 0.16±0.01  | 0.14                              | 0.24   | 0.17   |
| Chordwise curvature |         |                                                         |          |           |                                    |            |            |                                   |        |        |
| chord1              | ASp3    | -7.3±1.1                                                | -8.1±2.9 | 3.3±18.5  | -0.02±0.00                         | -0.04±0.01 | -0.03±0.01 | -0.03                             | -0.05  | -0.04  |
|                     | ARy2    | -0.3±1.2                                                | -1.4±0.5 | -0.9±0.5  | -0.15±0.03                         | -0.38±0.29 | -0.09±0.01 | -0.18                             | -0.72  | -0.10  |
|                     | ARy5    | -3.8±5.9                                                | 4.0±0.8  | -3.6±4.6  | -0.04±0.01                         | -0.05±0.00 | -0.05±0.02 | -0.05                             | -0.05  | -0.06  |
|                     | ARy8    | 8.6±5.3                                                 | -0.6±4.5 | 1.7±1.3   | -0.05±0.01                         | -0.06±0.02 | -0.05±0.01 | -0.05                             | -0.07  | -0.06  |
| chord2              | ASp3    | 14.5±0.8                                                | 10.3±5.6 | 13.8±6.8  | 0.10±0.04                          | 0.08±0.03  | 0.06±0.02  | 0.15                              | 0.11   | 0.08   |
|                     | ARy2    | 3.1±19.1                                                | -7.3±1.8 | 17.1±11.4 | 0.04±0.01                          | 0.09±0.02  | 0.04±0.01  | 0.06                              | 0.11   | 0.05   |
|                     | ARy5    | 1.4±1.7                                                 | 5.9±5.8  | 4.8±13.5  | 0.06±0.01                          | 0.06±0.01  | 0.06±0.01  | 0.07                              | 0.06   | 0.07   |
|                     | ARy8    | -7.7±0.9                                                | -5.4±2.2 | -1.9±6.8  | 0.06±0.00                          | 0.06±0.01  | 0.08±0.02  | 0.07                              | 0.07   | 0.09   |

See Table S1 for the description of  $\Delta\text{Time}$ , Mean  $\kappa$  and Max  $\kappa$ . See text for the description of the parameters.  $N=3$  sequences per fish.
